# Supplementary material for: A N-doped porous carbon derived from deep eutectic solvent for adsorption of organic contaminants from aqueous or oil solution
Source: Royal Society of Chemistry journal article supplement (doi:10.1039/d0ra04542j), 2020-01-01
Supplement: d0ra04542j1.pdf [file d0ra04542j1.pdf]

**Table S1** Porous structure parameters of NCMs

| NCMs  | $S_{mic}$ (m <sup>2</sup> /g) | $S_{meso}$ (m <sup>2</sup> /g) | $S_{BET}$ (m <sup>2</sup> /g) | $V_{total}$ (cc/g) |
|-------|-------------------------------|--------------------------------|-------------------------------|--------------------|
| NCM-1 | 830.993                       | 91.279                         | 922.272                       | 0.4066             |
| NCM-2 | 1025.554                      | 221.981                        | 1247.535                      | 0.6180             |
| NCM-3 | 798.938                       | 174.477                        | 973.415                       | 0.4671             |
| NCM-4 | 739.164                       | 147.008                        | 886.172                       | 0.4294             |

**Table S2** XPS data-envelope of O1s for NCM-2

| Binding Energy (±0.2eV) | Assignment       | Relative percentage(%) |
|-------------------------|------------------|------------------------|
| 532.0                   | C=O              | 45.1                   |
| 532.8                   | R-OH, C-O-C      | 46                     |
| 533.6                   | Oxygen in bridge | 0.9                    |

Relative percentage estimated from the ratio  $\text{Area O1s}_i / \sum \text{Area O}$

**Table S3** XPS data-envelope of N1s for NCM-2

| Binding Energy (±0.2eV) | Assignment       | Relative percentage(%) |
|-------------------------|------------------|------------------------|
| 398.2                   | N pyridinic      | 12.7                   |
| 399.9                   | Pyrolic N        | 12.4                   |
| 400.9                   | Graphitic N      | 35.1                   |
| 401.8                   | pyridine N-oxide | 39.8                   |

Relative percentage estimated from the ratio  $\text{Area N1s}_i / \sum \text{Area N}$

**Table S4** Adsorption rate constant for 4-NP and MB

| Adsorbate | Pseudo-second-order |                                                |        |
|-----------|---------------------|------------------------------------------------|--------|
|           | $q_e$ (mg/g)        | $k_2$ (g·mg <sup>-1</sup> ·min <sup>-1</sup> ) | $R^2$  |
| 4-NP      | 483.7               | 0.00307                                        | 0.9992 |
| MB        | 449.0               | 0.00105                                        | 0.9990 |

**Table S5** Langmuir and Freundlich parameters for 4-NP and MB

| Adsorbate | Langmuir |       |        | Freundlich |       |        |
|-----------|----------|-------|--------|------------|-------|--------|
|           | $K_L$    | $Q_m$ | $R^2$  | $K_F$      | $n$   | $R^2$  |
| 4-NP      | 0.0860   | 487.0 | 0.9932 | 116.6      | 4.227 | 0.9649 |
| MB        | 0.4283   | 439.9 | 0.9995 | 184.4      | 6.688 | 0.9308 |
